# Supplementary material for: Comparison of the 24 h Dietary Recall of Two Consecutive Days, Two Non-Consecutive Days, Three Consecutive Days, and Three Non-Consecutive Days for Estimating Dietary Intake of Chinese Adult
Source: MDPI journal article supplement (doi:10.3390/nu14091960), 2022-05-07
Supplement: s1 [file s1]

**Table S1** The mean bias, mean relative bias and MSE of estimates obtained with each scenario.

| Dietary components | Parameter | True Value | Mean Bias (Mean Relative Bias %) |                |                |                | MSE      |          |          |          |
|--------------------|-----------|------------|----------------------------------|----------------|----------------|----------------|----------|----------|----------|----------|
|                    |           |            | C2                               | NC2            | C3             | NC3            | C2       | NC2      | C3       | NC3      |
| Energy(kcal)       | Mean      | 1591.74    | 0.19(0.01)                       | 0.56(0.03)     | 0.23(0.01)     | 0.70(0.04)     | 2548.70  | 2303.38  | 2530.30  | 2253.84  |
|                    | P5        | 981.83     | -145.27(14.80)                   | -146.29(14.90) | -117.41(11.96) | -113.96(11.61) | 22085.48 | 22173.01 | 15012.37 | 13765.79 |
|                    | P10       | 1091.76    | -137.60(12.60)                   | -128.79(11.80) | -109.11(9.99)  | -103.07(9.44)  | 19834.24 | 17134.44 | 12577.09 | 11240.45 |
|                    | P25       | 1286.44    | -92.05(7.16)                     | -86.15(6.70)   | -76.87(5.98)   | -65.31(5.08)   | 9598.23  | 8496.23  | 7023.83  | 5639.67  |
|                    | P50       | 1543.51    | -25.92(2.77)                     | -20.59(2.79)   | -18.35(3.05)   | -14.65(2.70)   | 2831.76  | 2761.74  | 2957.89  | 2416.41  |
|                    | P75       | 1858.45    | 46.62(3.84)                      | 49.09(3.88)    | 33.68(3.99)    | 33.98(3.52)    | 7588.07  | 7518.43  | 7232.85  | 5923.83  |
|                    | P90       | 2147.91    | 187.06(8.71)                     | 173.00(8.05)   | 153.73(7.20)   | 137.99(6.48)   | 47445.66 | 38989.42 | 34995.62 | 26421.90 |
|                    | P95       | 2388.49    | 239.31(10.02)                    | 221.78(9.29)   | 185.75(7.78)   | 163.86(6.87)   | 69300.09 | 60093.31 | 45953.04 | 36221.36 |
| Fat(g)             | Mean      | 37.54      | 0.10(0.26)                       | -0.03(-0.09)   | 0.16(0.42)     | -0.07(-0.19)   | 0.70     | 0.59     | 0.53     | 0.40     |
|                    | P5        | 13.72      | -3.29(23.97)                     | -3.45(25.14)   | -2.14(15.57)   | -2.17(15.83)   | 11.44    | 12.27    | 5.11     | 5.06     |
|                    | P10       | 18.51      | -4.91(26.54)                     | -4.90(26.48)   | -3.62(19.57)   | -3.77(20.38)   | 24.79    | 24.37    | 13.54    | 14.58    |
|                    | P25       | 25.21      | -4.41(17.49)                     | -4.53(17.99)   | -3.02(11.99)   | -3.25(12.90)   | 20.16    | 21.00    | 9.91     | 11.03    |
|                    | P50       | 35.72      | -3.2(8.95)                       | -3.35(9.37)    | -2.46(6.88)    | -2.61(7.30)    | 11.25    | 11.82    | 7.09     | 7.27     |
|                    | P75       | 47.41      | 1.68(3.95)                       | 1.58(3.58)     | 1.50(3.46)     | 1.34(3.19)     | 5.41     | 4.33     | 4.39     | 3.12     |
|                    | P90       | 59.45      | 9.01(15.15)                      | 9.05(15.23)    | 6.75(11.35)    | 6.62(11.13)    | 86.92    | 88.72    | 48.87    | 48.05    |
|                    | P95       | 67.16      | 15.74(23.43)                     | 14.94(22.25)   | 12.58(18.73)   | 10.43(15.53)   | 259.24   | 234.01   | 169.23   | 115.35   |
| Protein(g)         | Mean      | 66.47      | -0.01(-0.01)                     | 0.02(0.03)     | -0.04(-0.06)   | 0.03(0.05)     | 3.34     | 2.97     | 3.16     | 2.77     |
|                    | P5        | 38.46      | -6.48(16.84)                     | -6.31(16.40)   | -5.29(13.75)   | -4.93(12.82)   | 43.03    | 40.86    | 29.42    | 25.33    |
|                    | P10       | 43.48      | -6.42(14.76)                     | -6.04(13.88)   | -5.36(12.33)   | -4.64(10.67)   | 42.73    | 37.34    | 29.73    | 22.72    |
|                    | P25       | 51.70      | -3.98(7.69)                      | -3.84(7.42)    | -3.11(6.01)    | -2.72(5.27)    | 17.24    | 15.82    | 10.54    | 8.30     |
|                    | P50       | 63.66      | -1.78(3.18)                      | -1.48(2.78)    | -1.53(2.75)    | -0.93(2.34)    | 5.56     | 4.33     | 4.28     | 3.01     |
|                    | P75       | 79.31      | 1.24(2.68)                       | 1.06(2.68)     | 0.98(2.56)     | 0.69(2.14)     | 7.15     | 6.49     | 6.44     | 4.58     |
|                    | P90       | 91.21      | 10.33(11.32)                     | 9.48(10.39)    | 8.46(9.28)     | 7.71(8.45)     | 124.67   | 107.60   | 87.89    | 75.06    |
|                    | P95       | 103.04     | 13.92(13.51)                     | 11.79(11.44)   | 10.69(10.38)   | 9.26(8.99)     | 237.60   | 175.03   | 147.45   | 113.17   |
| CHO(g)             | Mean      | 247.87     | -0.17(-0.07)                     | 0.19(0.08)     | -0.26(-0.10)   | 0.31(0.12)     | 97.51    | 90.99    | 96.08    | 89.11    |
|                    | P5        | 136.92     | -22.35(16.33)                    | -22.63(16.53)  | -18.77(13.71)  | -18.13(13.24)  | 514.20   | 524.70   | 363.85   | 345.42   |
|                    | P10       | 150.43     | -17.98(11.95)                    | -16.57(11.02)  | -12.89(8.57)   | -12.93(8.60)   | 331.97   | 285.81   | 174.98   | 178.11   |
|                    | P25       | 182.75     | -12.77(6.99)                     | -11.97(6.55)   | -10.97(6)      | -8.74(4.85)    | 203.7    | 177.34   | 158.66   | 111.74   |
|                    | P50       | 226.53     | -0.39(3.98)                      | 0.39(3.88)     | -0.68(3.87)    | 0.75(4.11)     | 92.54    | 97.25    | 85.09    | 100.30   |
|                    | P75       | 297.98     | 7.29(4.77)                       | 8.61(4.86)     | 6.11(4.84)     | 7.05(4.40)     | 261.60   | 274.90   | 254.93   | 229.70   |
|                    | P90       | 377.20     | 15.08(5.07)                      | 15.14(4.69)    | 11.67(4.77)    | 10.26(4.1)     | 595.71   | 534.69   | 475.94   | 405.80   |
|                    | P95       | 428.02     | 27.14(6.50)                      | 24.46(6.20)    | 21.50(5.79)    | 16.79(5.32)    | 1438.60  | 1199.31  | 1139.48  | 808.03   |
| Dietary Fiber(g)   | Mean      | 10.42      | 0.01(0.07)                       | 0(0.02)        | 0(0.01)        | 0(-0.02)       | 0.16     | 0.16     | 0.14     | 0.15     |
|                    | P5        | 5.46       | -1.73(31.63)                     | -1.70(31.11)   | -1.39(25.42)   | -1.37(25.01)   | 3.03     | 2.91     | 1.95     | 1.89     |
|                    | P10       | 6.04       | -1.49(24.71)                     | -1.42(23.42)   | -1.19(19.71)   | -1.11(18.4)    | 2.26     | 2.03     | 1.43     | 1.26     |
|                    | P25       | 7.81       | -1.39(17.82)                     | -1.36(17.43)   | -1.11(14.18)   | -1.06(13.54)   | 1.99     | 1.9      | 1.27     | 1.17     |
|                    | P50       | 9.79       | -0.57(6.08)                      | -0.55(5.83)    | -0.43(5.07)    | -0.40(4.5)     | 0.47     | 0.47     | 0.33     | 0.32     |
|                    | P75       | 12.38      | 0.53(5.31)                       | 0.56(5.45)     | 0.46(5.16)     | 0.49(5.36)     | 0.68     | 0.69     | 0.54     | 0.60     |
|                    | P90       | 15.52      | 1.99(12.84)                      | 1.97(12.70)    | 1.66(10.66)    | 1.45(9.35)     | 4.75     | 4.61     | 3.55     | 2.90     |
|                    | P95       | 17.50      | 3.52(20.10)                      | 3.36(19.17)    | 2.63(15.03)    | 2.55(14.57)    | 13.72    | 12.62    | 7.82     | 7.34     |
| Cholesterol(mg)    | Mean      | 370.29     | 0.80(0.22)                       | -0.45(-0.12)   | 1.28(0.35)     | -0.72(-0.19)   | 192.65   | 232.95   | 151.17   | 228.50   |
|                    | P5        | 102.38     | -92.05(89.91)                    | -91.17(89.06)  | -73.27(71.57)  | -70.68(69.04)  | 8533.76  | 8353.78  | 5498.00  | 5100.34  |
|                    | P10       | 149.13     | -94.46(63.34)                    | -92.85(62.26)  | -54.56(36.58)  | -50.06(33.57)  | 9152.71  | 8811.25  | 3313.17  | 2678.14  |
|                    | P25       | 254.40     | -67.6(26.57)                     | -65.51(25.75)  | -48.63(19.12)  | -49.89(19.61)  | 4822.29  | 4504.73  | 2740.99  | 2891.46  |
|                    | P50       | 353.17     | -8.74(3.95)                      | -10.39(4.13)   | -6.40(3.38)    | -8.07(3.81)    | 334.40   | 358.69   | 232.61   | 324.21   |
|                    | P75       | 473.24     | 35.74(7.67)                      | 31.76(6.90)    | 27.50(5.89)    | 23.47(5.47)    | 1608.28  | 1326.65  | 1025.86  | 872.72   |
|                    | P90       | 593.55     | 106.65(17.97)                    | 100.01(16.85)  | 81.43(13.72)   | 69.36(11.69)   | 12057.88 | 10794.09 | 6972.83  | 5549.41  |
|                    | P95       | 672.92     | 164.16(24.39)                    | 159.7(23.73)   | 121.84(18.11)  | 113.63(16.89)  | 28138.34 | 27029.16 | 15729.61 | 13690.12 |
| Calcium(mg)        | Mean      | 427.04     | 0.34(0.08)                       | -0.10(-0.02)   | 0.50(0.12)     | -0.23(-0.05)   | 45.75    | 39.59    | 38.00    | 29.36    |
|                    | P5        | 218.74     | -66.73(30.51)                    | -63.21(28.9)   | -53.53(24.47)  | -49.26(22.52)  | 4500.62  | 4070.07  | 2938.8   | 2510.05  |
|                    | P10       | 249.64     | -61.60(24.68)                    | -59.78(23.95)  | -49.32(19.76)  | -46.59(18.66)  | 3878.33  | 3646.45  | 2514.09  | 2252.17  |
|                    | P25       | 309.89     | -45.42(14.66)                    | -44.14(14.24)  | -34.70(11.20)  | -33.59(10.84)  | 2127.21  | 2009.32  | 1234.90  | 1176.94  |
|                    | P50       | 406.26     | -23.39(5.76)                     | -23.47(5.78)   | -18.60(4.58)   | -18.45(4.54)   | 646.62   | 620.23   | 407.31   | 380.45   |
|                    | P75       | 515.45     | 19.55(3.79)                      | 16.86(3.41)    | 16.70(3.30)    | 15.12(3.18)    | 465.04   | 410.34   | 376.32   | 342.73   |
|                    | P90       | 631.10     | 84.5(13.39)                      | 82.97(13.15)   | 66.74(10.58)   | 61.71(9.78)    | 7735.87  | 7471.48  | 5222.41  | 4205.99  |
|                    | P95       | 720.27     | 135.74(18.85)                    | 130.36(18.10)  | 113.66(15.78)  | 101.3(14.06)   | 20266.30 | 18634.97 | 14876.69 | 11559.24 |

| Tabе SI. Cont.     |           |            |                        |                |                |                |           |           |           |           |
|--------------------|-----------|------------|------------------------|----------------|----------------|----------------|-----------|-----------|-----------|-----------|
| Dietary components | Parameter | True Value | Bias (Relative Bias %) |                |                |                | MSE       |           |           |           |
|                    |           |            | C2                     | NC2            | C3             | NC3            | C2        | NC2       | C3        | NC3       |
| Iron (mg)          | Mean      | 19.62      | -0.01(-0.04)           | 0.01(0.05)     | -0.02(-0.08)   | 0.02(0.09)     | 1.49      | 1.36      | 1.43      | 1.31      |
|                    | P5        | 12.00      | -2.75(22.96)           | -2.72(22.64)   | -2.39(19.89)   | -2.23(18.55)   | 7.64      | 7.46      | 5.75      | 5.03      |
|                    | P10       | 13.20      | -2.57(19.48)           | -2.44(18.46)   | -2.21(16.73)   | -1.97(14.93)   | 6.71      | 6.06      | 4.96      | 3.99      |
|                    | P25       | 15.58      | -2.01(12.93)           | -1.9(12.19)    | -1.63(10.44)   | -1.51(9.68)    | 4.31      | 3.85      | 2.85      | 2.54      |
|                    | P50       | 18.81      | -1.12(6.11)            | -1.05(6.01)    | -0.80(4.92)    | -0.71(5.11)    | 1.86      | 1.85      | 1.30      | 1.32      |
|                    | P75       | 22.91      | 0.32(5.63)             | 0.34(5.44)     | 0.35(6.14)     | 0.39(5.34)     | 2.41      | 2.39      | 3.11      | 2.39      |
|                    | P90       | 27.30      | 3.34(12.53)            | 3.18(11.98)    | 2.84(11.07)    | 2.58(10.95)    | 20.20     | 16.99     | 15.29     | 13.43     |
|                    | P95       | 29.48      | 7.16(24.29)            | 6.99(23.71)    | 5.55(18.94)    | 5.04(17.14)    | 67.81     | 65.22     | 42.77     | 36.17     |
| Zinc (mg)          | Mean      | 9.90       | -0.01(-0.07)           | 0(0.04)        | -0.01(-0.14)   | 0.01(0.07)     | 0.12      | 0.11      | 0.11      | 0.10      |
|                    | P5        | 5.63       | -1.08(19.13)           | -1.03(18.30)   | -0.91(16.19)   | -0.85(15.08)   | 1.18      | 1.09      | 0.87      | 0.76      |
|                    | P10       | 6.17       | -0.87(14.11)           | -0.8(12.89)    | -0.72(11.63)   | -0.58(9.33)    | 0.79      | 0.67      | 0.54      | 0.39      |
|                    | P25       | 7.53       | -0.63(8.42)            | -0.58(7.71)    | -0.50(6.66)    | -0.42(5.63)    | 0.44      | 0.40      | 0.29      | 0.24      |
|                    | P50       | 9.31       | -0.19(3.36)            | -0.19(2.87)    | -0.12(3.15)    | -0.09(2.62)    | 0.13      | 0.11      | 0.13      | 0.09      |
|                    | P75       | 11.82      | 0.04(2.98)             | 0.08(3.06)     | 0.02(2.93)     | 0.03(2.82)     | 0.17      | 0.19      | 0.17      | 0.17      |
|                    | P90       | 14.06      | 1.16(8.28)             | 1.07(7.61)     | 0.98(6.99)     | 0.87(6.21)     | 1.86      | 1.54      | 1.36      | 1.08      |
|                    | P95       | 16.06      | 1.75(10.89)            | 1.52(9.48)     | 1.28(8.1)      | 1.13(7.09)     | 3.90      | 3.03      | 2.40      | 1.87      |
| Magnesium (mg)     | Mean      | 279.06     | -0.06(-0.02)           | 0.13(0.05)     | -0.17(-0.06)   | 0.14(0.05)     | 81.16     | 75.95     | 79.44     | 74.88     |
|                    | P5        | 172.49     | -32.3(18.73)           | -31.85(18.46)  | -26.34(15.27)  | -25.14(14.58)  | 1067.43   | 1040.58   | 723.69    | 655.52    |
|                    | P10       | 189.59     | -27.63(14.57)          | -26.15(13.79)  | -22.19(11.71)  | -20.97(11.06)  | 786.96    | 706.20    | 508.28    | 469.28    |
|                    | P25       | 225.24     | -21.89(9.72)           | -20.91(9.28)   | -17.80(7.9)    | -16.51(7.33)   | 507.35    | 467.72    | 339.53    | 304.49    |
|                    | P50       | 270.03     | -8.13(3.23)            | -7.36(2.96)    | -5.8(2.59)     | -4.42(2.3)     | 142.45    | 120.17    | 99.61     | 76.21     |
|                    | P75       | 324.03     | 11.46(4.83)            | 10.48(4.51)    | 9.46(4.94)     | 9.00(4.30)     | 290.68    | 260.38    | 283.12    | 226.18    |
|                    | P90       | 376.32     | 41.09(10.92)           | 41.81(11.11)   | 34.96(9.29)    | 31.82(8.57)    | 2085.69   | 2061.35   | 1589.29   | 1345.59   |
|                    | P95       | 409.26     | 65.99(16.12)           | 62.99(15.39)   | 53.99(13.19)   | 48.94(11.96)   | 4824.27   | 4513.57   | 3460.27   | 2858.36   |
| Sodium (mg)        | Mean      | 901.42     | 1.34(0.15)             | -0.12(-0.01)   | 2.06(0.23)     | -0.48(-0.05)   | 631.87    | 597.59    | 336.23    | 327.51    |
|                    | P5        | 301.27     | -112.25(37.26)         | -109.76(36.43) | -89.05(29.56)  | -87.53(29.05)  | 12958.65  | 12402.90  | 8413.25   | 8066.79   |
|                    | P10       | 371.51     | -116.79(31.44)         | -115.78(31.16) | -91.79(24.71)  | -91.56(24.65)  | 13919.95  | 13714.87  | 8585.24   | 8590.26   |
|                    | P25       | 537.73     | -132.34(24.61)         | -133.69(24.86) | -103.26(19.20) | -103.18(19.19) | 17719.29  | 18067.40  | 10834.99  | 10861.11  |
|                    | P50       | 808.07     | -115.44(14.29)         | -115.17(14.25) | -77.14(9.55)   | -77.51(9.59)   | 13744.83  | 13671.79  | 6247.53   | 6231.88   |
|                    | P75       | 1190.64    | -15.84(2.55)           | -22.2(2.96)    | -20.92(2.59)   | -20.76(2.57)   | 1452.01   | 2013.14   | 1407.19   | 1520.81   |
|                    | P90       | 1531.49    | 289.40(18.90)          | 286.13(18.68)  | 223.89(14.62)  | 222.14(14.51)  | 90381.98  | 89051.91  | 54808.45  | 54519.73  |
|                    | P95       | 1784.09    | 535.93(30.04)          | 523.17(29.32)  | 415.60(23.29)  | 393.43(22.05)  | 304828.20 | 292408.40 | 185574.70 | 167047.70 |
| Potassium (mg)     | Mean      | 1656.70    | 0.07(0)                | 0.10(0.01)     | -0.10(-0.01)   | 0.30(0.02)     | 3258.73   | 3144.80   | 3203.10   | 3052.69   |
|                    | P5        | 998.88     | -193.84(19.41)         | -185.65(18.59) | -159.5(15.97)  | -148.94(14.91) | 38311.02  | 35067.40  | 26364.52  | 22718.79  |
|                    | P10       | 1119.60    | -178.89(15.98)         | -167.52(14.96) | -150.79(13.47) | -136.89(12.23) | 32792.73  | 28622.93  | 23064.33  | 19050.10  |
|                    | P25       | 1333.47    | -134.78(10.11)         | -123.59(9.27)  | -112.54(8.44)  | -95.51(7.16)   | 19330.11  | 16450.42  | 13670.92  | 10301.32  |
|                    | P50       | 1597.43    | -38.32(3.07)           | -35.89(3.04)   | -37.21(3.15)   | -24.14(3.09)   | 3880.79   | 3759.59   | 4127.07   | 3251.57   |
|                    | P75       | 1930.12    | 68.66(4.24)            | 62.14(3.76)    | 66.83(4.24)    | 50.16(3.66)    | 10468.08  | 8405.42   | 9444.06   | 7320.60   |
|                    | P90       | 2269.66    | 228.69(10.08)          | 215.80(9.51)   | 195.50(8.61)   | 176.49(7.78)   | 66645.00  | 58896.07  | 51795.01  | 44803.84  |
|                    | P95       | 2557.98    | 291.99(11.42)          | 272.25(10.66)  | 218.98(8.56)   | 216.54(8.61)   | 111862.40 | 102786.20 | 72060.84  | 75703.08  |
| Phosphorus (mg)    | Mean      | 976.50     | -0.48(-0.05)           | 0.39(0.04)     | -0.80(-0.08)   | 0.79(0.08)     | 782.79    | 722.82    | 769.02    | 700.48    |
|                    | P5        | 610.11     | -102.06(16.73)         | -101.87(16.70) | -86.48(14.18)  | -82.38(13.5)   | 10775.16  | 10546.43  | 7791.37   | 6937.30   |
|                    | P10       | 674.41     | -93.89(13.92)          | -88.17(13.07)  | -77.19(11.45)  | -67.51(10.01)  | 9062.07   | 7957.88   | 6282.96   | 4827.38   |
|                    | P25       | 788.41     | -58.47(7.42)           | -53.2(6.75)    | -49.13(6.23)   | -38.49(4.88)   | 3772.87   | 3213.81   | 2812.55   | 1798.56   |
|                    | P50       | 952.28     | -25.55(2.95)           | -18.76(2.58)   | -20.35(2.67)   | -14.10(2.44)   | 1066.90   | 899.55    | 952.05    | 746.62    |
|                    | P75       | 1139.44    | 26.44(3.29)            | 25.16(3.05)    | 18.22(2.98)    | 17.68(2.96)    | 1940.12   | 1805.31   | 1515.16   | 1704.29   |
|                    | P90       | 1313.30    | 115.21(8.77)           | 102.68(7.85)   | 92.65(7.18)    | 81.78(6.28)    | 16790.63  | 14209.80  | 12594.32  | 9936.27   |
|                    | P95       | 1418.67    | 194.67(13.72)          | 173.51(12.23)  | 161.16(11.36)  | 143.57(10.12)  | 44571.04  | 34753.17  | 29948.51  | 24606.41  |
| Vitamin A (µgRAE)  | Mean      | 415.13     | 0.35(0.09)             | -0.5(-0.12)    | 0.49(0.12)     | -0.78(-0.19)   | 1369.94   | 1428.52   | 1219.94   | 1355.04   |
|                    | P5        | 194.64     | -101.19(51.99)         | -100.47(51.62) | -83.34(42.82)  | -81.39(41.82)  | 10310.13  | 10156.09  | 7034.74   | 6713.83   |
|                    | P10       | 224.68     | -96.03(42.74)          | -94.41(42.02)  | -76.61(34.1)   | -76.29(33.96)  | 9299.17   | 9016.13   | 5964.67   | 5906.18   |
|                    | P25       | 288.28     | -84.37(29.27)          | -83.09(28.82)  | -67.66(23.47)  | -65.78(22.82)  | 7313.06   | 7089.38   | 4816.73   | 4615.03   |
|                    | P50       | 377.66     | -58.6(15.52)           | -59.09(15.65)  | -46.60(12.34)  | -45.46(12.07)  | 3977.19   | 4119.48   | 2845.51   | 2849.18   |
|                    | P75       | 502.10     | -0.26(8.41)            | -2.99(8.86)    | 4.71(8.59)     | 1.82(8.79)     | 2595.59   | 2781.51   | 2814.40   | 2857.93   |
|                    | P90       | 650.15     | 129.24(20.82)          | 127.87(21.06)  | 108.33(18.02)  | 109.57(18.13)  | 28020.08  | 27645.74  | 19369.27  | 20473.38  |
|                    | P95       | 762.83     | 300.28(39.36)          | 294.41(38.59)  | 251.77(33.00)  | 233.34(30.59)  | 106654.4  | 105198.5  | 75792.43  | 67715.72  |

| Table S1. Cont.    |           |            |                                  |               |               |               |         |         |         |               |
|--------------------|-----------|------------|----------------------------------|---------------|---------------|---------------|---------|---------|---------|---------------|
| Dietary components | Parameter | True Value | Mean Bias (Mean Relative Bias %) |               |               |               | MSE     |         |         |               |
|                    |           |            | C2                               | NC2           | C3            | NC3           | C2      | NC2     | C3      | NC3           |
| Vitamin C (mg)     | Mean      | 65.68      | -0.06(-0.09)                     | 0.01(0.01)    | -0.21(-0.31)  | -0.03(-0.04)  | 15.88   | 16.13   | 14.30   | 15.65         |
|                    | P5        | 28.59      | -13.71(47.96)                    | -13.71(47.97) | -11.32(39.59) | -10.4(36.37)  | 191.38  | 191.45  | 130.65  | 110.08        |
|                    | P10       | 35.41      | -14.13(39.91)                    | -13.44(37.94) | -11.51(32.49) | -10.53(29.75) | 205.34  | 184.91  | 135.68  | 115.61        |
|                    | P25       | 45.32      | -9.88(21.81)                     | -9.52(21.00)  | -7.72(17.03)  | -7.39(16.31)  | 105.04  | 99.41   | 66.08   | 65.57         |
|                    | P50       | 61.68      | -4.69(8.59)                      | -4.75(8.07)   | -3.92(7.31)   | -3.60(6.81)   | 38.72   | 36.95   | 29.25   | 27.16         |
|                    | P75       | 80.23      | 4.98(6.95)                       | 5.01(6.84)    | 3.85(5.77)    | 3.79(5.98)    | 50.78   | 50.25   | 36.61   | 35.68         |
|                    | P90       | 101.46     | 16.76(16.52)                     | 16.64(16.40)  | 13.85(13.65)  | 12.98(12.80)  | 367.07  | 351.90  | 263.58  | 232.32        |
|                    | P95       | 120.30     | 24.08(20.02)                     | 22.81(18.96)  | 17.59(14.62)  | 15.80(13.14)  | 680.31  | 619.95  | 377.94  | 334.97        |
| Vitamin E (mg)     | Mean      | 11.75      | 0.03(0.24)                       | 0(-0.04)      | 0.03(0.29)    | -0.01(-0.12)  | 0.39    | 0.32    | 0.39    | 0.31          |
|                    | P5        | 6.47       | -2.3(35.58)                      | -2.25(34.82)  | -1.96(30.22)  | -1.86(28.71)  | 5.34    | 5.12    | 3.85    | 3.49          |
|                    | P10       | 7.36       | -2.27(30.85)                     | -2.21(29.97)  | -1.9(25.85)   | -1.77(23.98)  | 5.20    | 4.92    | 3.65    | 3.17          |
|                    | P25       | 9.03       | -2.03(22.45)                     | -1.96(21.73)  | -1.6(17.68)   | -1.52(16.88)  | 4.23    | 3.96    | 2.71    | 2.46          |
|                    | P50       | 11.3       | -1.34(11.83)                     | -1.26(11.19)  | -0.96(8.46)   | -0.92(8.21)   | 2.09    | 1.91    | 1.24    | 1.16          |
|                    | P75       | 13.9       | 0.66(5.99)                       | 0.64(5.87)    | 0.74(6.66)    | 0.61(5.83)    | 1.11    | 1.06    | 1.29    | 0.95          |
|                    | P90       | 16.84      | 3.79(22.52)                      | 3.60(21.4)    | 3.05(18.09)   | 2.75(16.34)   | 16.18   | 14.72   | 11.00   | 8.84          |
|                    | P95       | 18.5       | 7.14(38.61)                      | 6.70(36.21)   | 5.17(27.97)   | 4.83(26.10)   | 54.46   | 47.87   | 29.13   | 25.15         |
| Vitamin B1 (mg)    | Mean      | 0.87       | 0(-0.09)                         | 0(0.07)       | 0(-0.09)      | 0(0.15)       | 0       | 0       | 0       | 0             |
|                    | P5        | 0.50       | -0.13(26.27)                     | -0.13(26.02)  | -0.10(19.7)   | -0.10(20.34)  | 0.02    | 0.02    | 0.01    | 0.01          |
|                    | P10       | 0.56       | -0.12(21.41)                     | -0.12(21.80)  | -0.10(17.40)  | -0.10(17.41)  | 0.01    | 0.02    | 0.01    | 0.01          |
|                    | P25       | 0.67       | -0.08(12.27)                     | -0.07(11.2)   | -0.06(9.15)   | -0.05(8.11)   | 0.01    | 0.01    | 0       | 0             |
|                    | P50       | 0.83       | -0.03(4.37)                      | -0.03(4.06)   | -0.02(3.93)   | -0.02(3.26)   | 0       | 0       | 0       | 0             |
|                    | P75       | 1.03       | 0.05(5.02)                       | 0.05(5.37)    | 0.05(4.59)    | 0.04(4.36)    | 0       | 0       | 0       | 0             |
|                    | P90       | 1.26       | 0.14(11.43)                      | 0.15(11.59)   | 0.11(8.81)    | 0.11(8.61)    | 0.02    | 0.02    | 0.01    | 0.01          |
|                    | P95       | 1.43       | 0.20(13.74)                      | 0.18(12.84)   | 0.15(10.72)   | 0.14(9.65)    | 0.04    | 0.04    | 0.03    | 0.02          |
| Vitamin B2 (mg)    | Mean      | 0.81       | 0(0.02)                          | 0(-0.01)      | 0(0.06)       | 0(-0.01)      | 0       | 0       | 0       | 0             |
|                    | P5        | 0.48       | -0.11(22.19)                     | -0.10(21.79)  | -0.09(19.53)  | -0.09(18.13)  | 0.01    | 0.01    | 0.01    | 0.01          |
|                    | P10       | 0.52       | -0.08(15.04)                     | -0.08(14.83)  | -0.06(11.17)  | -0.06(11.20)  | 0.01    | 0.01    | 0       | 0             |
|                    | P25       | 0.65       | -0.07(10.77)                     | -0.07(10.51)  | -0.06(9.05)   | -0.05(8.20)   | 0.01    | 0.01    | 0       | 0             |
|                    | P50       | 0.79       | -0.03(3.92)                      | -0.03(3.76)   | -0.02(3.34)   | -0.02(2.94)   | 0       | 0       | 0       | 0             |
|                    | P75       | 0.94       | 0.03(3.79)                       | 0.03(3.48)    | 0.03(3.17)    | 0.03(3.08)    | 0       | 0       | 0       | 0             |
|                    | P90       | 1.09       | 0.13(11.88)                      | 0.13(11.52)   | 0.12(10.72)   | 0.11(9.83)    | 0.02    | 0.02    | 0.02    | 0.01          |
|                    | P95       | 1.23       | 0.18(15.09)                      | 0.17(14.18)   | 0.15(12.59)   | 0.14(11.66)   | 0.04    | 0.03    | 0.03    | 0.02          |
| Vitamin B3 (mg)    | Mean      | 14.04      | 0(-0.02)                         | 0(0.02)       | 0(-0.02)      | 0(0.01)       | 0.13    | 0.14    | 0.1     | 0.13          |
|                    | P5        | 6.86       | -1.61(23.52)                     | -1.49(21.74)  | -1.33(19.35)  | -1.15(16.83)  | 2.67    | 2.26    | 1.79    | 1.36          |
|                    | P10       | 7.96       | -1.55(19.42)                     | -1.45(18.2)   | -1.27(15.99)  | -1.13(14.23)  | 2.45    | 2.14    | 1.64    | 1.32          |
|                    | P25       | 10.05      | -1.07(10.68)                     | -1.07(10.66)  | -0.89(8.86)   | -0.91(9.09)   | 1.21    | 1.20    | 0.84    | 0.87          |
|                    | P50       | 13.00      | -0.38(2.96)                      | -0.35(2.96)   | -0.30(2.45)   | -0.19(2.16)   | 0.21    | 0.20    | 0.15    | 0.12          |
|                    | P75       | 17.44      | 0.15(2.79)                       | 0.12(2.88)    | 0.09(2.51)    | 0.07(2.89)    | 0.33    | 0.33    | 0.25    | 0.33          |
|                    | P90       | 21.61      | 1.57(7.7)                        | 1.48(7.03)    | 1.35(6.45)    | 1.15(5.56)    | 3.55    | 3.08    | 2.55    | 2.00          |
|                    | P95       | 24.70      | 2.87(11.61)                      | 2.74(11.15)   | 2.18(8.85)    | 2.22(8.99)    | 10.66   | 10.14   | 6.88    | 6.69          |
| Vitamin B9 (µg)    | Mean      | 144.52     | 0.24(0.16)                       | -0.17(-0.12)  | 0.34(0.24)    | -0.30(-0.21)  | 25.28   | 27.81   | 26.53   | 28.69         |
|                    | P5        | 74.92      | -28.02(37.40)                    | -27.60(36.84) | -22.49(30.02) | -21.84(29.16) | 793.71  | 770.79  | 512.10  | 484.03        |
|                    | P10       | 86.45      | -26.03(30.11)                    | -25.80(29.85) | -21.01(24.30) | -20.54(23.76) | 685.68  | 671.68  | 447.49  | 427.45        |
|                    | P25       | 108.35     | -19.93(18.40)                    | -19.72(18.20) | -16.03(14.80) | -15.49(14.30) | 413.57  | 402.03  | 271.64  | 256.84        |
|                    | P50       | 135.34     | -6.40(4.90)                      | -5.71(4.65)   | -3.73(3.83)   | -3.46(3.84)   | 67.49   | 63.70   | 49.83   | 45.15         |
|                    | P75       | 173.99     | 9.19(5.62)                       | 8.08(5.53)    | 6.65(4.79)    | 5.76(4.70)    | 134.31  | 121.28  | 87.87   | 84.44         |
|                    | P90       | 213.38     | 33.68(15.78)                     | 29.57(13.86)  | 26.09(12.23)  | 21.27(9.97)   | 1244.39 | 980.37  | 755.11  | 538.83        |
|                    | P95       | 243.80     | 52.21(21.41)                     | 48.91(20.06)  | 39.74(16.30)  | 36.37(14.92)  | 2921.68 | 2598.00 | 1794.97 | 1500.09       |
| Wheat (g)          | Mean      | 170.40     | 0.31(0.18)                       | -0.50(-0.29)  | 0.63(0.37)    | 53.12         | 51.35   | 46.00   | 45.14   | -0.45(-0.27)  |
|                    | P5        | 39.09      | -38.34(98.08)                    | -22.33(57.12) | -23.23(59.42) | 1414.38       | 1479.01 | 505.36  | 552.21  | -37.48(95.88) |
|                    | P10       | 51.68      | -26.27(50.83)                    | -18.8(36.39)  | -19.09(36.94) | 650.07        | 703.26  | 360.92  | 372.41  | -25.31(48.98) |
|                    | P25       | 80.06      | -13.28(16.59)                    | -10.08(12.59) | -8.23(10.28)  | 209.90        | 196.07  | 111.59  | 79.20   | -13.92(17.39) |
|                    | P50       | 142.26     | -0.94(3.60)                      | -2.59(3.63)   | -0.78(3.44)   | 57.74         | 41.65   | 40.26   | 35.71   | -3.97(4.56)   |
|                    | P75       | 238.70     | 4.74(5.08)                       | -0.37(5.22)   | 1.99(5.22)    | 217.62        | 201.33  | 206.57  | 196.01  | 3.13(5.41)    |
|                    | P90       | 340.11     | 21.43(7.17)                      | 12.50(5.95)   | 15.07(6.23)   | 662.34        | 777.97  | 519.76  | 538.85  | 19.00(6.38)   |
|                    | P95       | 379.39     | 57.19(15.08)                     | 48.94(12.90)  | 46.78(12.33)  | 4049.47       | 3835.08 | 2814.60 | 2608.27 | 58.52(15.42)  |

| Table S1. Cont.    |           |            |                        |                |                |                |         |         |         |         |
|--------------------|-----------|------------|------------------------|----------------|----------------|----------------|---------|---------|---------|---------|
| Dietary components | Parameter | True Value | Bias (Relative Bias %) |                |                |                | MSE     |         |         |         |
|                    |           |            | C2                     | NC2            | C3             | NC3            | C2      | NC2     | C3      | NC3     |
| Pork (g)           | Mean      | 48.62      | 0.16(0.33)             | -0.09(-0.18)   | 0.38(0.78)     | -0.10(-0.21)   | 4.84    | 4.48    | 3.66    | 3.36    |
|                    | P5        | 1.86       | -1.86(100.00)          | -1.86(100.00)  | -1.86(100.00)  | -1.86(100.00)  | 3.45    | 3.45    | 3.45    | 3.45    |
|                    | P10       | 6.46       | -6.46(100.00)          | -6.46(100.00)  | -6.46(100.00)  | -6.46(100.00)  | 41.74   | 41.74   | 41.74   | 41.74   |
|                    | P25       | 20.71      | -20.71(100.00)         | -20.67(99.8)   | -12.41(59.93)  | -12.74(61.51)  | 429.08  | 427.46  | 158.87  | 165.9   |
|                    | P50       | 41.11      | -10.96(26.67)          | -11.09(26.98)  | -6.71(16.33)   | -6.99(17.01)   | 135.01  | 138.29  | 51.00   | 54.71   |
|                    | P75       | 70.96      | 2.83(6.03)             | 2.64(4.81)     | 1.57(4.03)     | 1.52(4.34)     | 22.18   | 16.57   | 11.97   | 13.73   |
|                    | P90       | 99.40      | 26.72(26.88)           | 25.89(26.05)   | 21.20(21.33)   | 19.22(19.34)   | 748.40  | 710.94  | 490.97  | 397.44  |
|                    | P95       | 118.48     | 47.29(39.92)           | 45.64(38.52)   | 32.07(27.07)   | 34.27(28.93)   | 2299.31 | 2179.34 | 1065.51 | 1244.73 |
| Vegetables (g)     | Mean      | 221.59     | -0.17(-0.08)           | 0(0)           | -0.07(-0.03)   | 0.13(0.06)     | 45.31   | 38.12   | 36.83   | 28.34   |
|                    | P5        | 92.77      | -44.38(47.84)          | -42.73(46.07)  | -33.69(36.32)  | -32.67(35.22)  | 1990.09 | 1853.40 | 1160.65 | 1096.74 |
|                    | P10       | 115.60     | -42.02(36.35)          | -41.91(36.25)  | -33.77(29.21)  | -32.45(28.07)  | 1785.84 | 1783.45 | 1165.28 | 1072.67 |
|                    | P25       | 152.07     | -31.18(20.50)          | -29.18(19.19)  | -25.29(16.63)  | -22.54(14.82)  | 998.71  | 872.37  | 653.75  | 531.96  |
|                    | P50       | 205.82     | -11.89(5.78)           | -9.93(5.08)    | -8.79(4.96)    | -6.71(3.66)    | 184.77  | 143.52  | 136.72  | 83.84   |
|                    | P75       | 276.24     | 16.40(6.23)            | 15.40(5.60)    | 12.80(4.95)    | 12.34(4.47)    | 419.00  | 308.78  | 283.12  | 208.32  |
|                    | P90       | 342.43     | 61.85(18.06)           | 58.61(17.12)   | 49.45(14.44)   | 44.5(13.00)    | 4146.79 | 3697.01 | 2717.41 | 2059.91 |
|                    | P95       | 394.86     | 88.21(22.34)           | 87.18(22.08)   | 72.94(18.47)   | 67.12(17.00)   | 8194.88 | 8082.75 | 5882.91 | 4812.53 |
| Milk (g)           | Mean      | 77.94      | 0.09(0.11)             | 0.04(0.06)     | 0.25(0.32)     | 0.09(0.12)     | 71.63   | 73.59   | 64.36   | 69.34   |
|                    | P5        | 0          | 0(-)                   | 0(-)           | 0(-)           | 0(-)           | 0       | 0       | 0       | 0       |
|                    | P10       | 0          | 0(-)                   | 0(-)           | 0(-)           | 0(-)           | 0       | 0       | 0       | 0       |
|                    | P25       | 15.72      | -15.72(100.00)         | -15.72(100.00) | -15.72(100.00) | -15.72(100.00) | 247.19  | 247.19  | 247.19  | 247.19  |
|                    | P50       | 60.71      | -60.71(100.00)         | -60.71(100.00) | -22.5(37.05)   | -26.94(44.63)  | 3686.22 | 3686.22 | 1026.48 | 1191.42 |
|                    | P75       | 115.48     | 3.97(8.93)             | 3.34(9.48)     | 7.09(20.06)    | 5.85(18.98)    | 111.56  | 126.05  | 572.60  | 528.16  |
|                    | P90       | 177.12     | 61.49(34.72)           | 60.16(33.97)   | 53.32(30.10)   | 47.82(27.00)   | 4139.85 | 4012.85 | 3404.62 | 2941.05 |
|                    | P95       | 223.21     | 29.04(13.01)           | 28.31(12.68)   | 30.79(13.79)   | 28.02(12.56)   | 868.04  | 815.04  | 1006.70 | 791.71  |
| Beans (g)          | Mean      | 50.15      | 0.06(0.12)             | 0.05(0.11)     | 0.15(0.30)     | 0.09(0.18)     | 19.58   | 20.09   | 16.13   | 19.05   |
|                    | P5        | 9.93       | -9.93(100.00)          | -9.93(100.00)  | -9.93(100.00)  | -9.93(100.00)  | 98.61   | 98.61   | 98.61   | 98.61   |
|                    | P10       | 14.49      | -14.49(100.00)         | -14.49(100.00) | -13.51(93.26)  | -13.26(91.57)  | 209.85  | 209.85  | 183.92  | 177.54  |
|                    | P25       | 26.86      | -17.07(63.56)          | -16.79(62.49)  | -13.11(48.79)  | -12.67(47.16)  | 295.61  | 284.85  | 176.88  | 163.09  |
|                    | P50       | 46.64      | -13.59(29.13)          | -13.27(28.44)  | -10.48(22.48)  | -10.36(22.20)  | 192.07  | 181.77  | 119.22  | 113.72  |
|                    | P75       | 67.04      | -0.77(8.83)            | -0.87(8.30)    | 1.00(8.60)     | 1.97(9.41)     | 44.31   | 38.51   | 38.31   | 48.86   |
|                    | P90       | 92.11      | 32.08(34.82)           | 30.45(33.06)   | 26.07(28.30)   | 24.05(26.11)   | 1202.82 | 1118.56 | 808.87  | 719.22  |
|                    | P95       | 104.32     | 67.56(64.76)           | 65.01(62.31)   | 48.01(46.02)   | 47.46(45.50)   | 4916.22 | 4568.12 | 2462.65 | 2564.99 |
