# Supplementary material for: Comparison of the 24 h Dietary Recall of Two Consecutive Days, Two Non-Consecutive Days, Three Consecutive Days, and Three Non-Consecutive Days for Estimating Dietary Intake of Chinese Adult
Source: MDPI journal article supplement (doi:10.3390/nu14091960), 2022-05-07
Supplement: s1 [file s1]

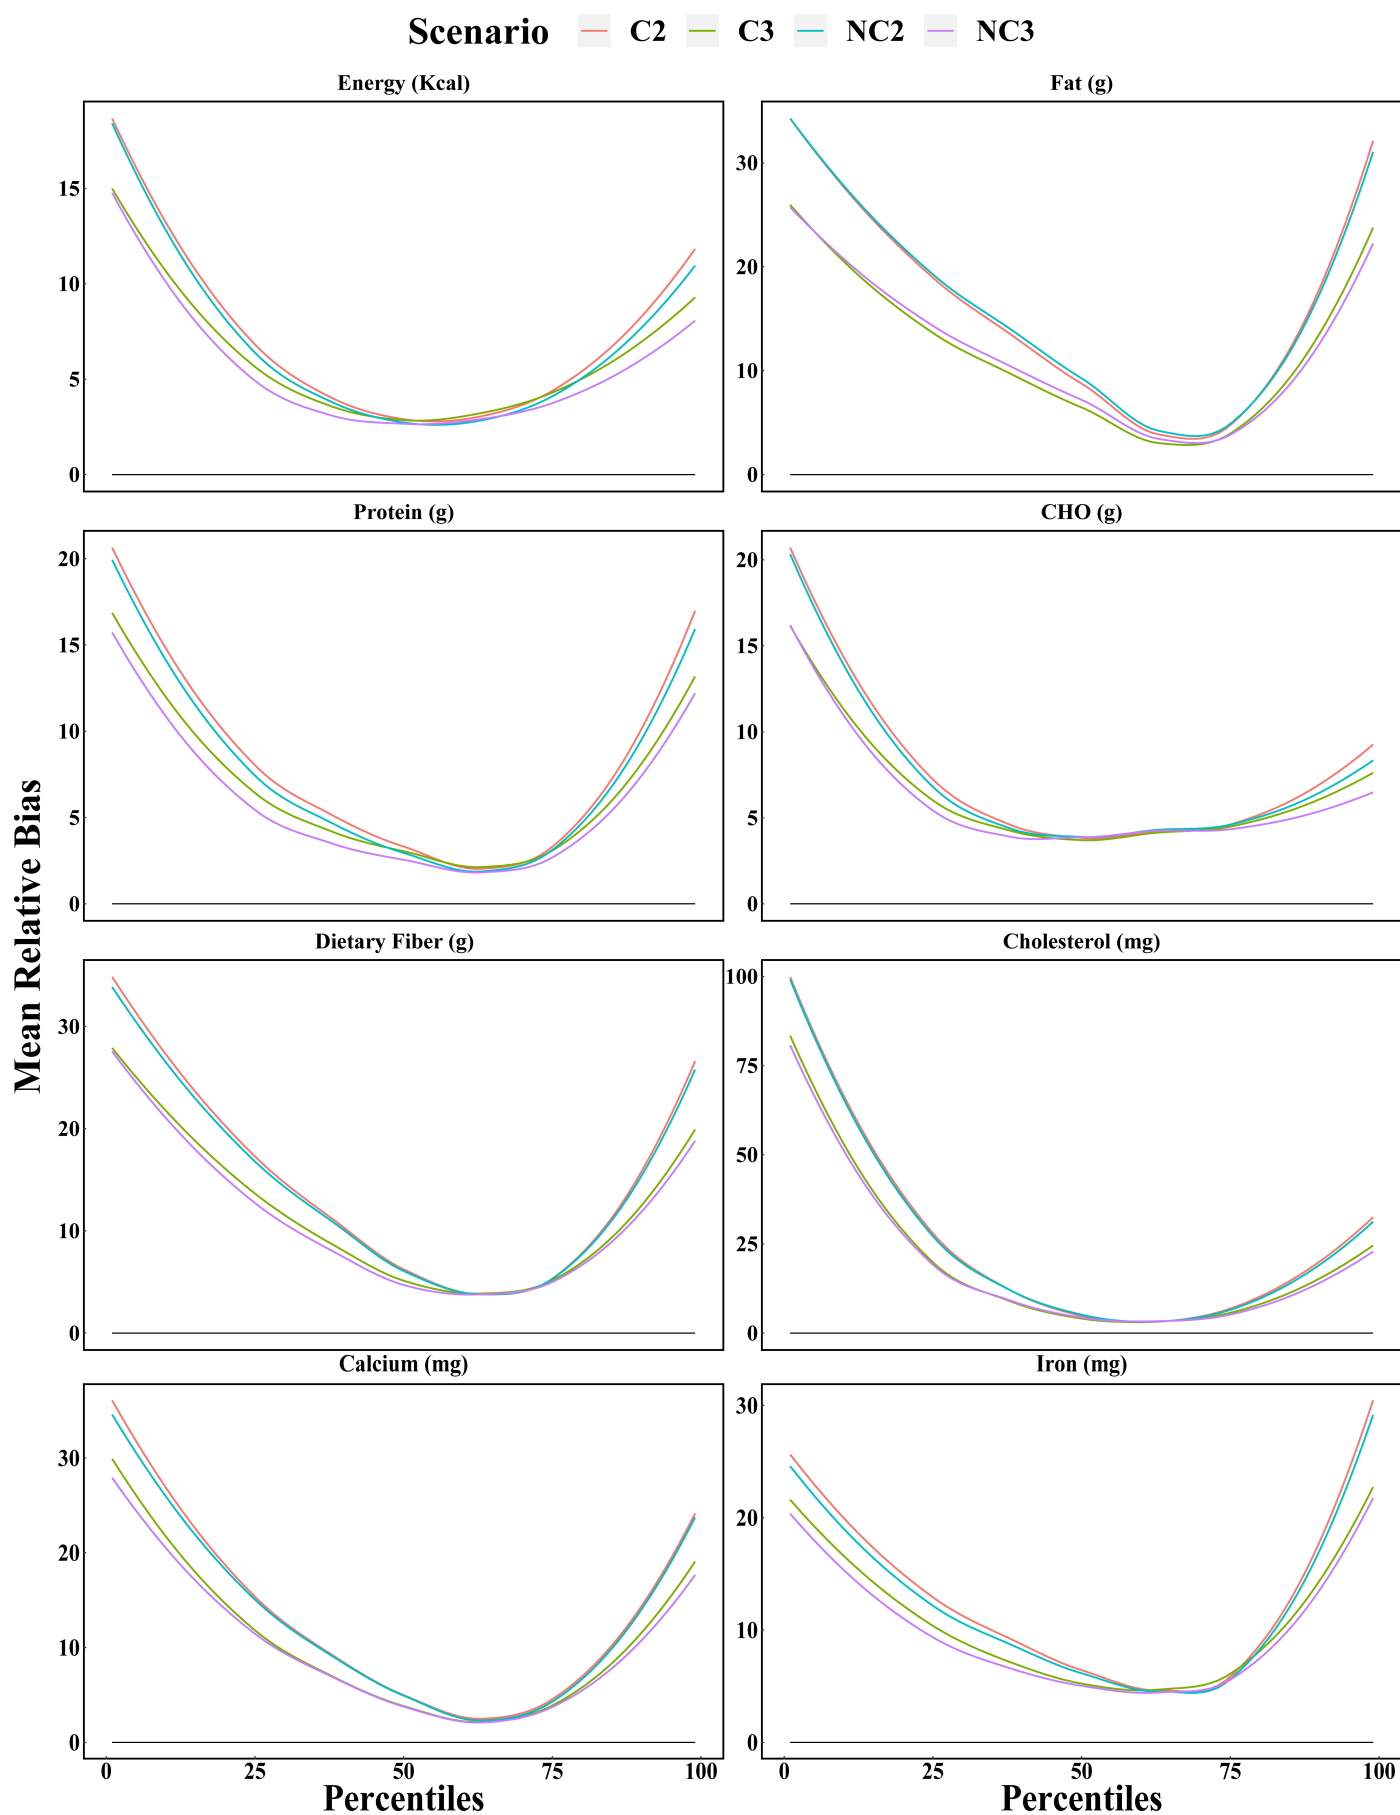

**Figure S2.** Mean relative bias of the percentiles (from 1st to 99th) of intake calculated for all dietary components based on each scenario with WPM method.

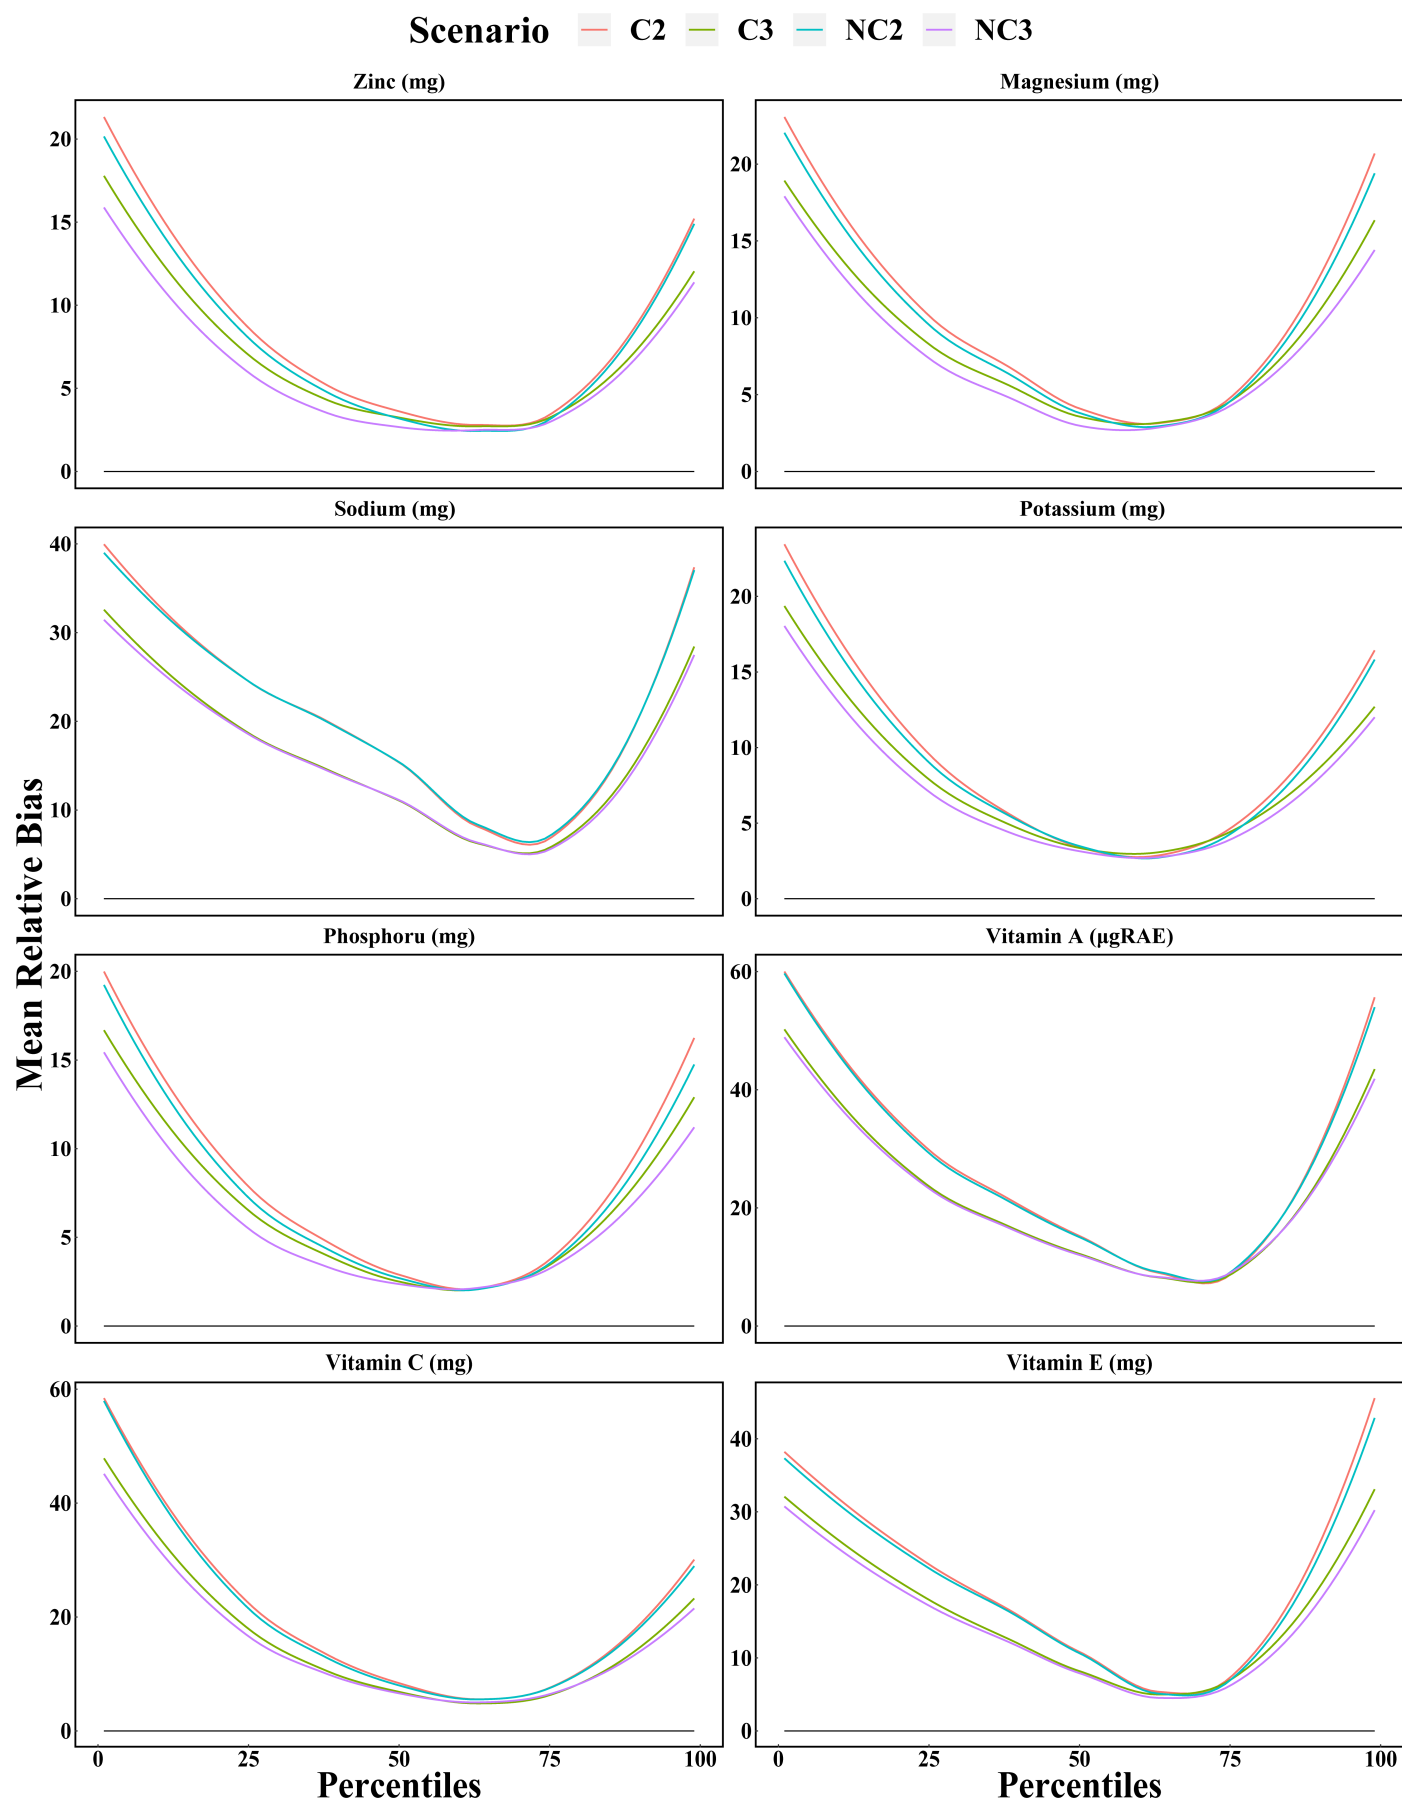

**Figure S2. Cont.**

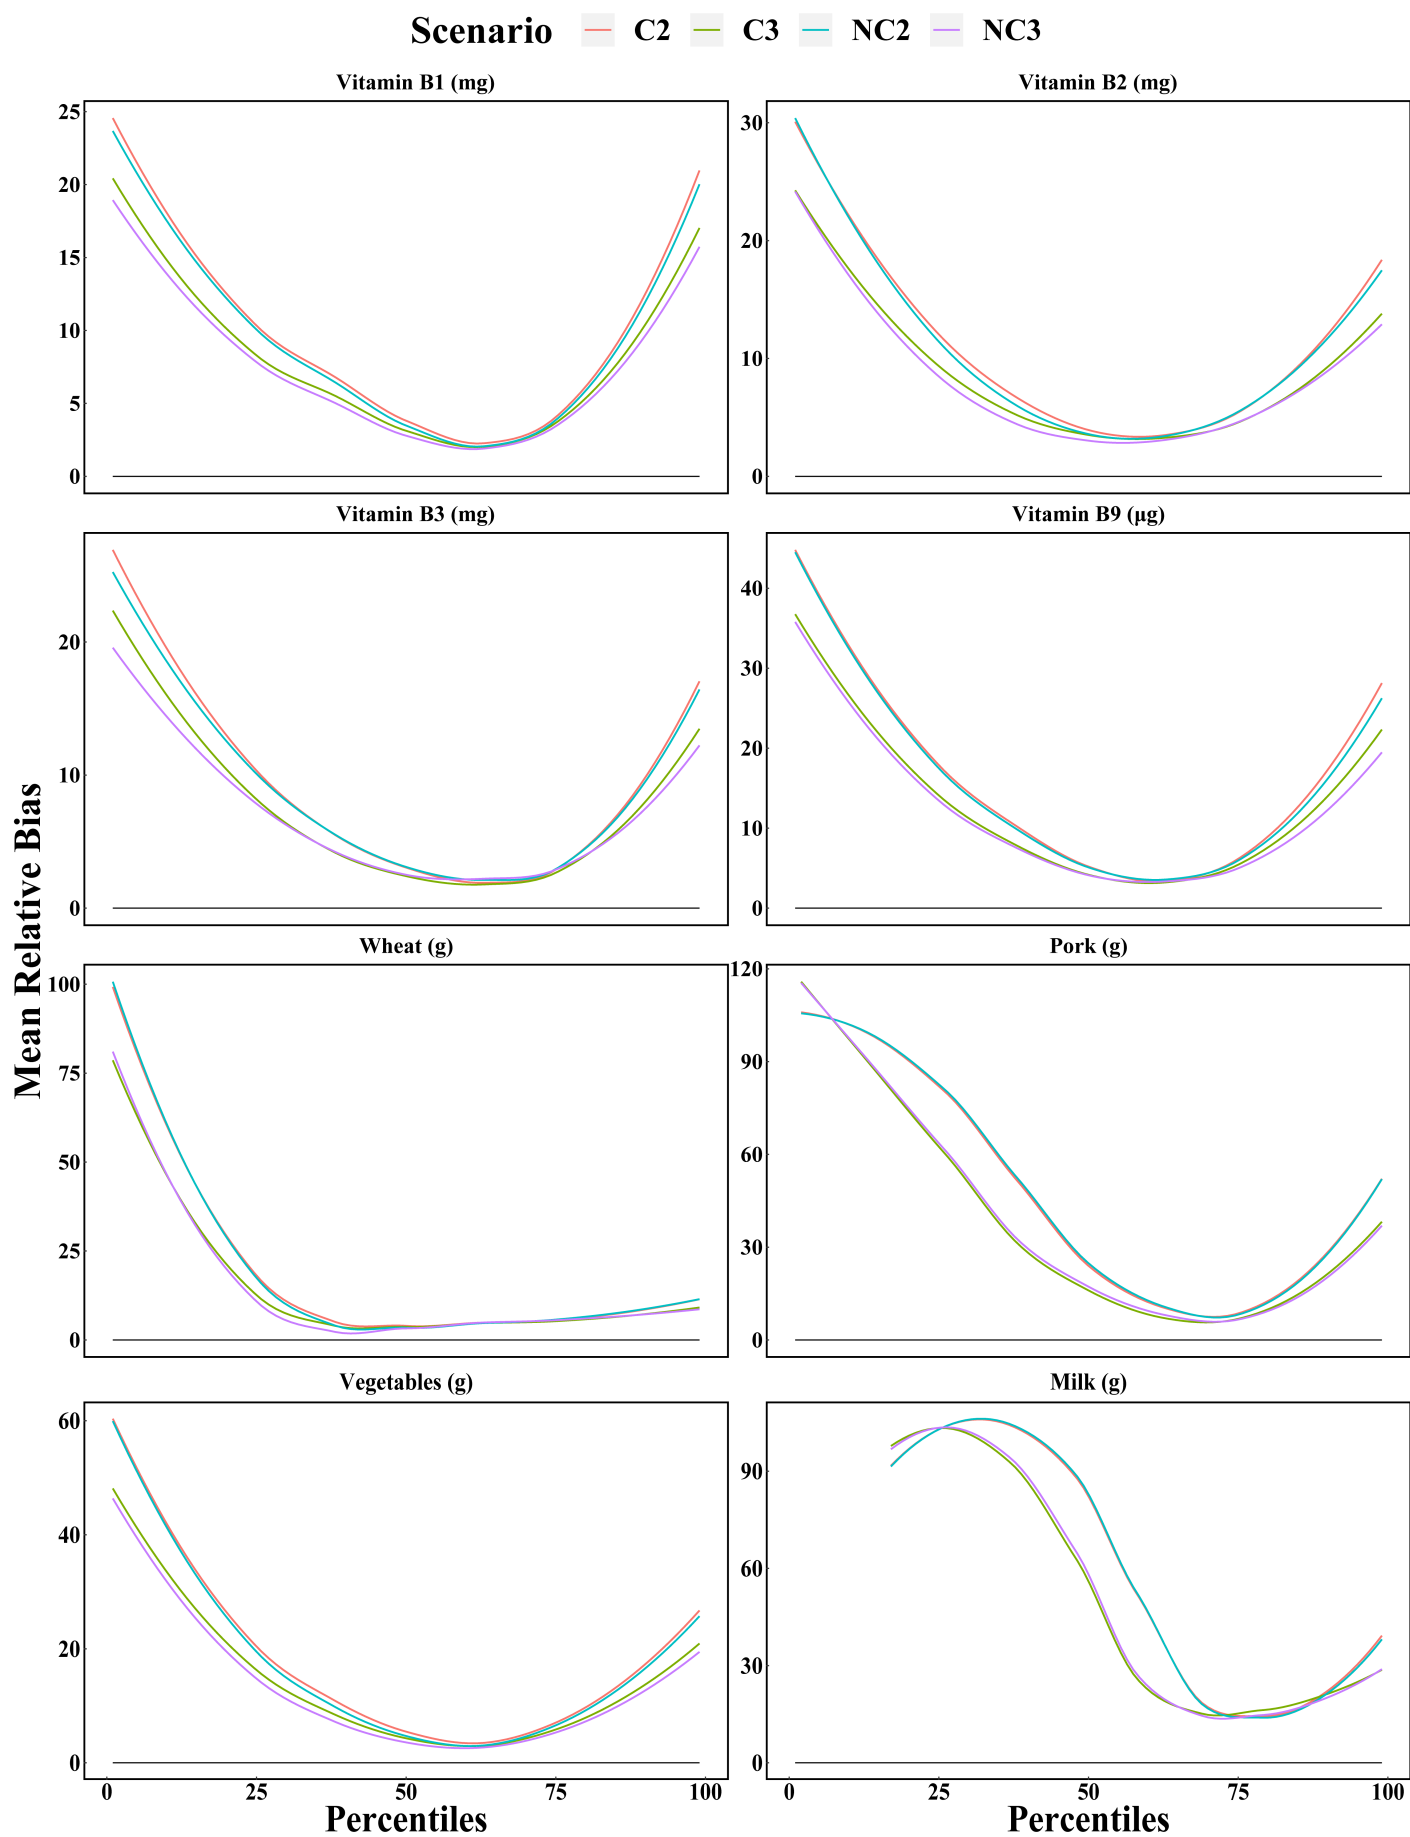

Figure S2. *Cont.*

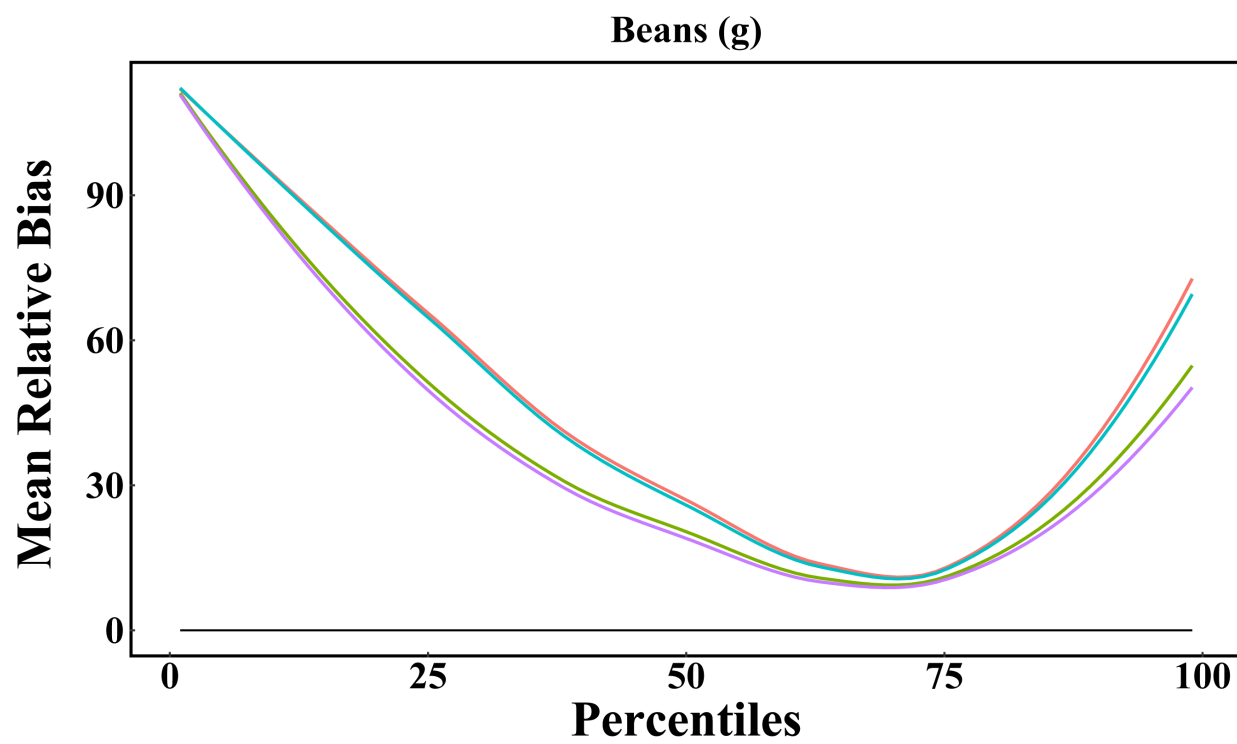

**Figure S2.** *Cont.*
