# Supplementary material for: Comparison of the 24 h Dietary Recall of Two Consecutive Days, Two Non-Consecutive Days, Three Consecutive Days, and Three Non-Consecutive Days for Estimating Dietary Intake of Chinese Adult
Source: MDPI journal article supplement (doi:10.3390/nu14091960), 2022-05-07
Supplement: s1 [file s1]

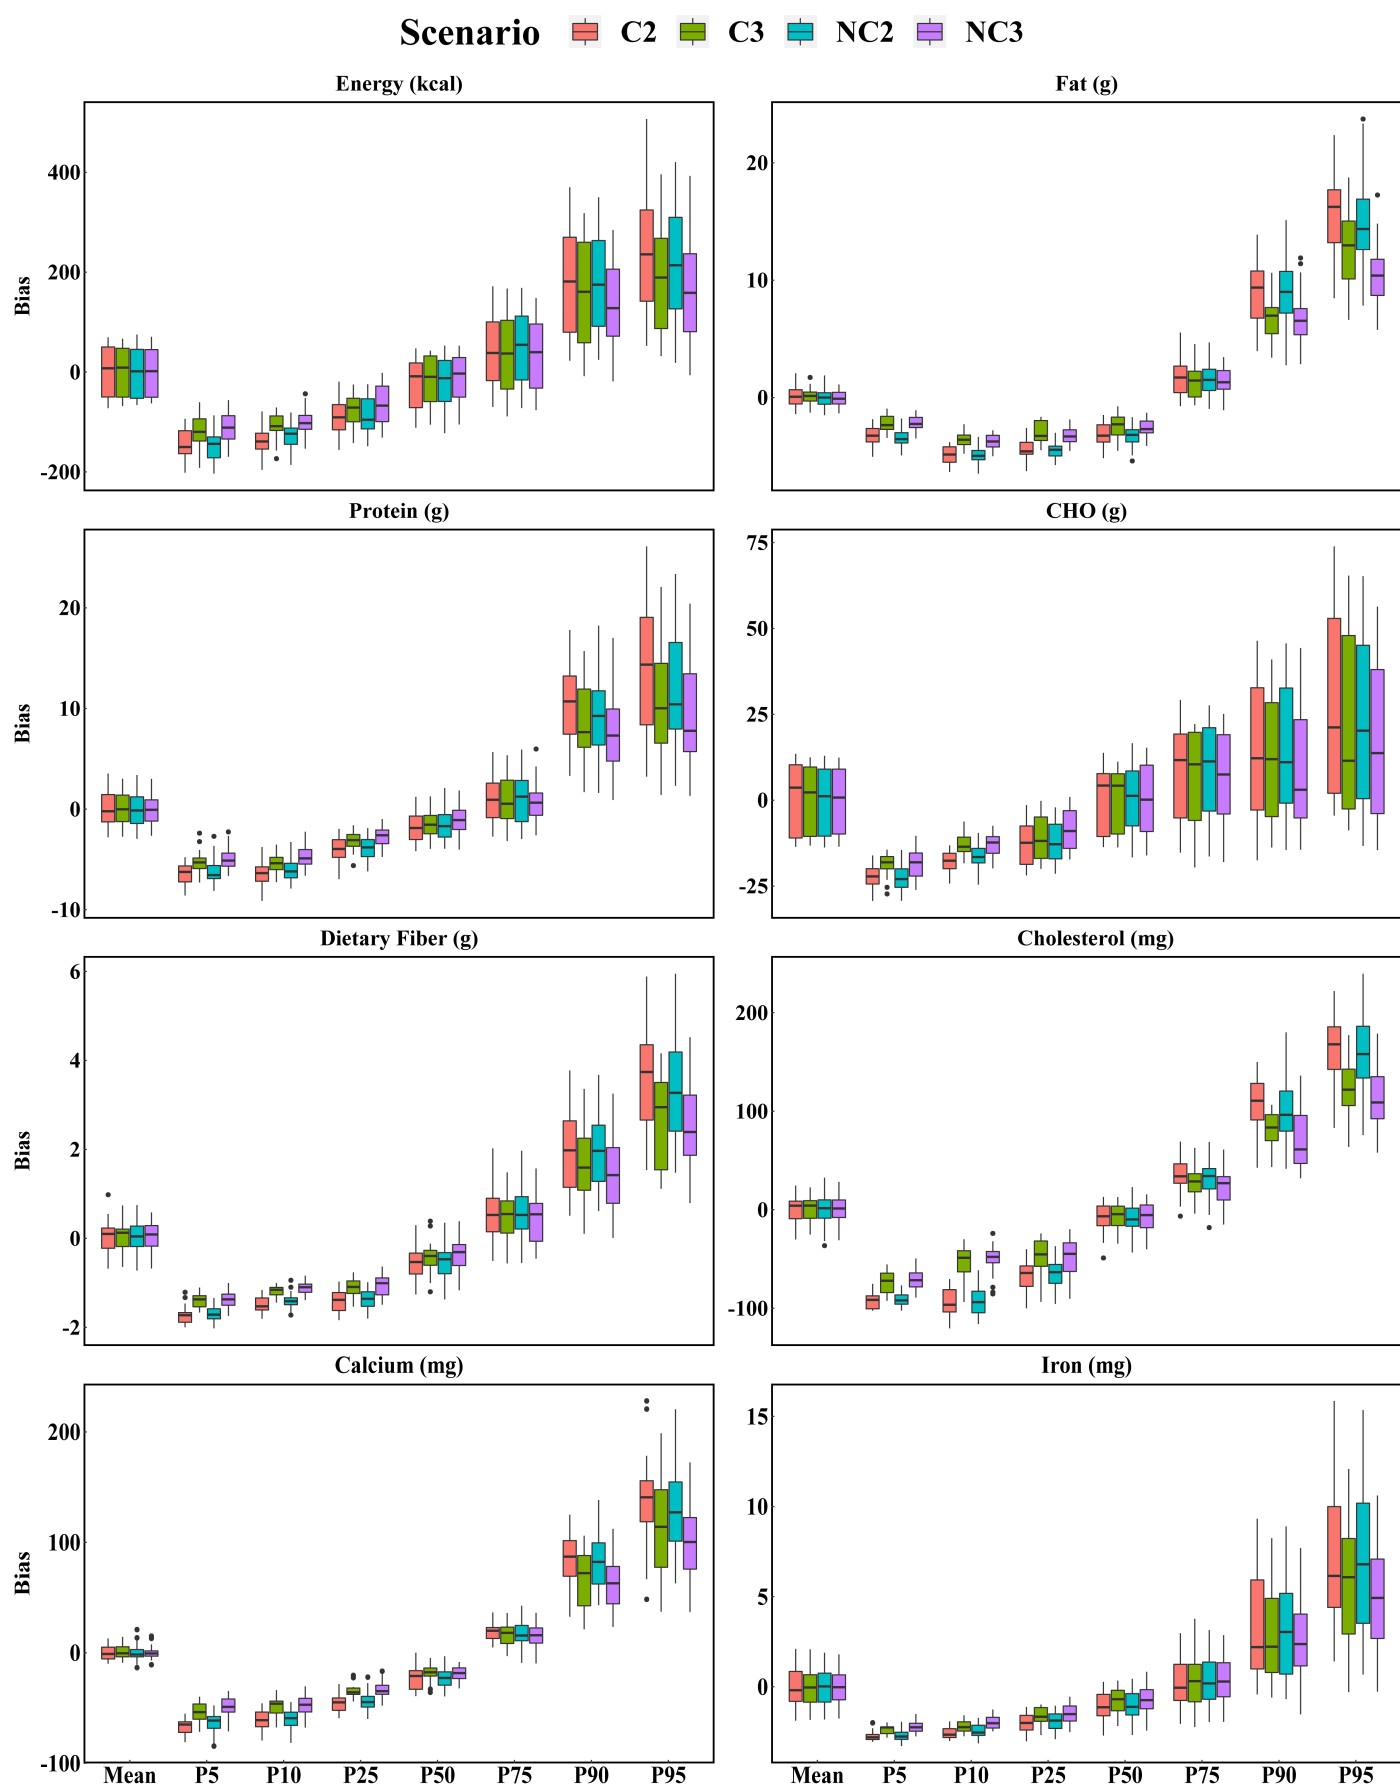

**Figure S1.** Boxplot of biases of intake calculated for all dietary components based on each scenario with WPM method. CHO—Carbohydrate.

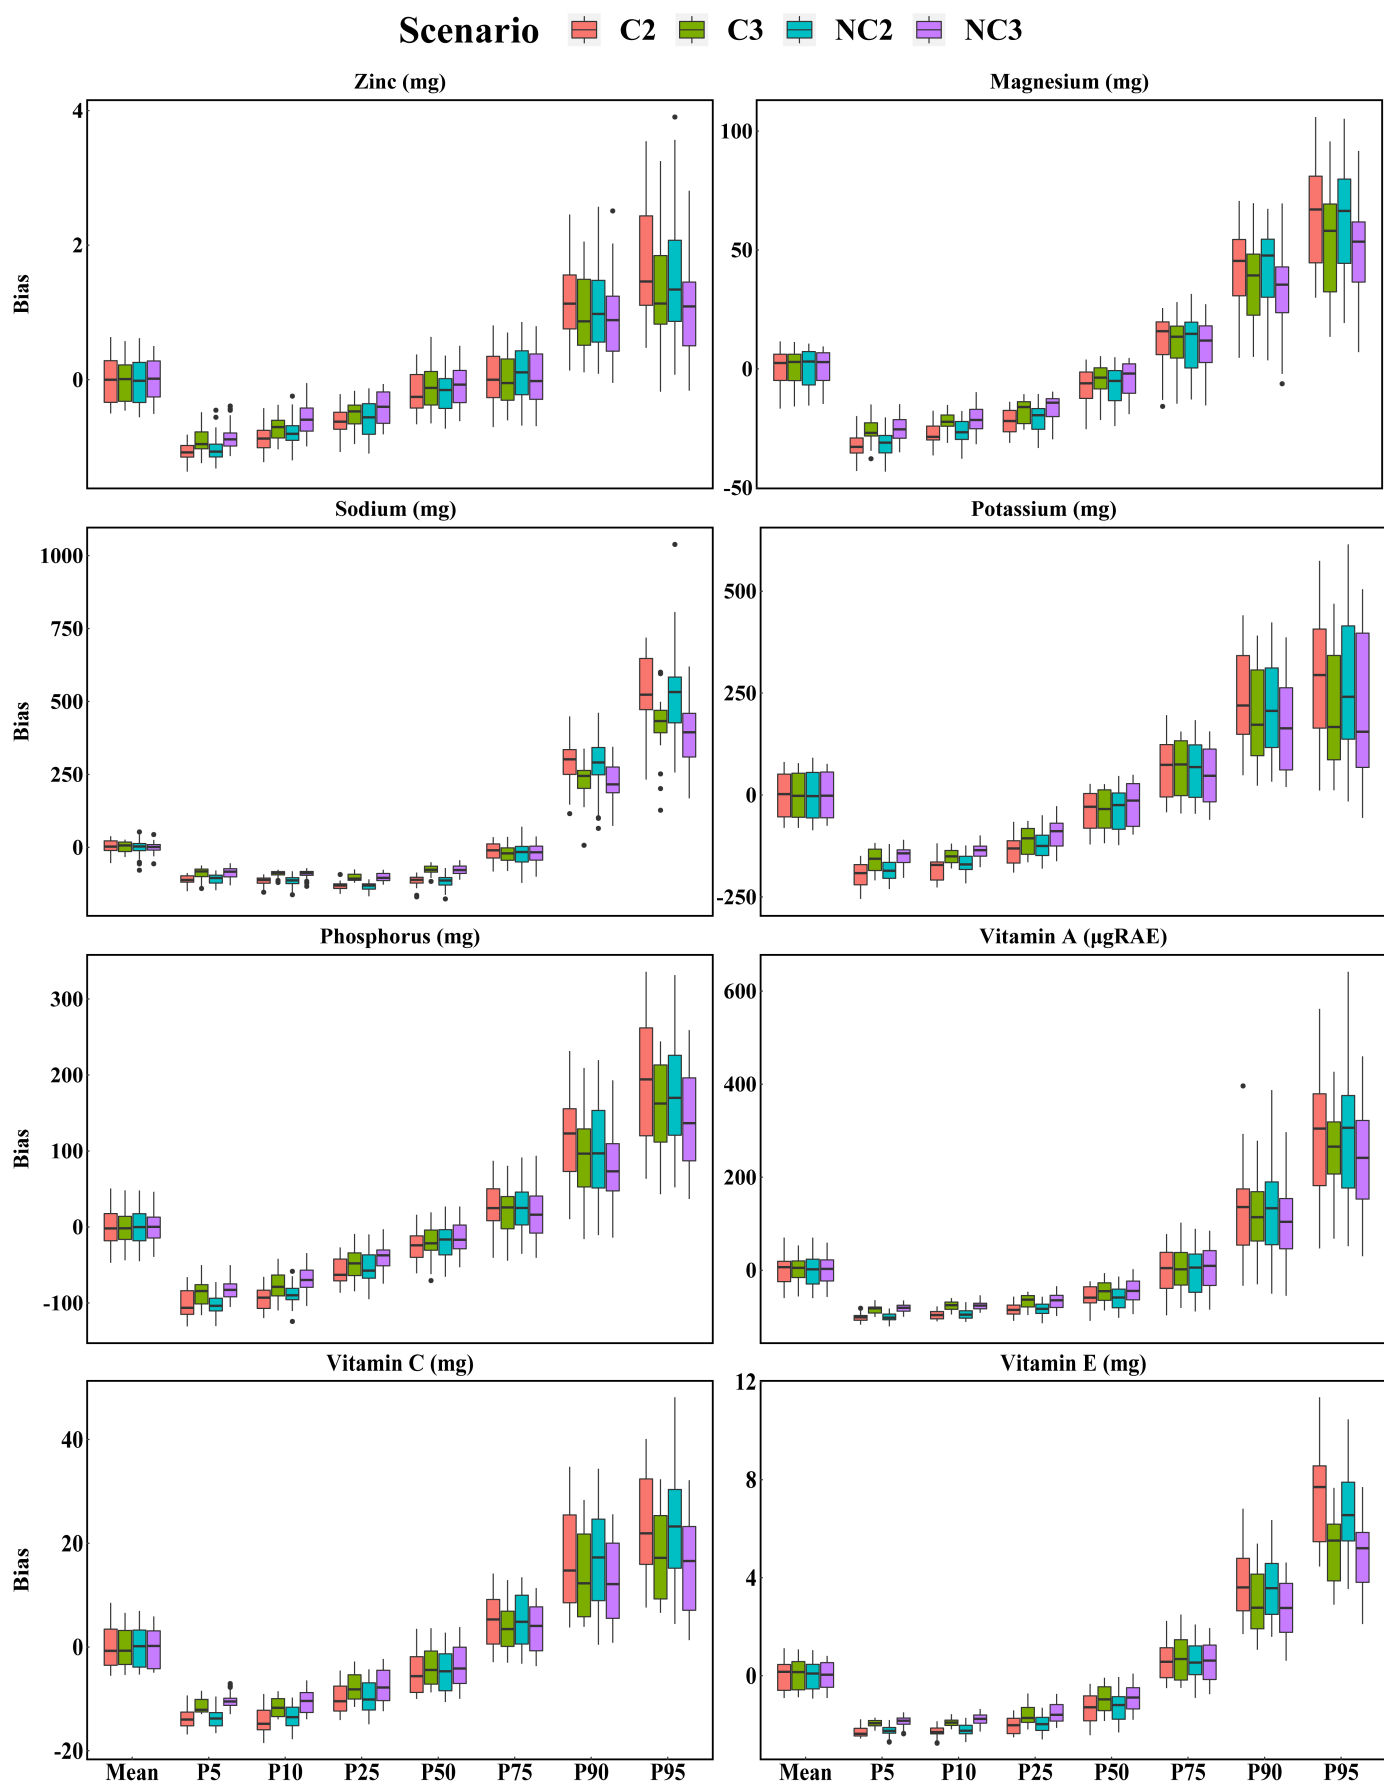

Figure S1. *Cont.*

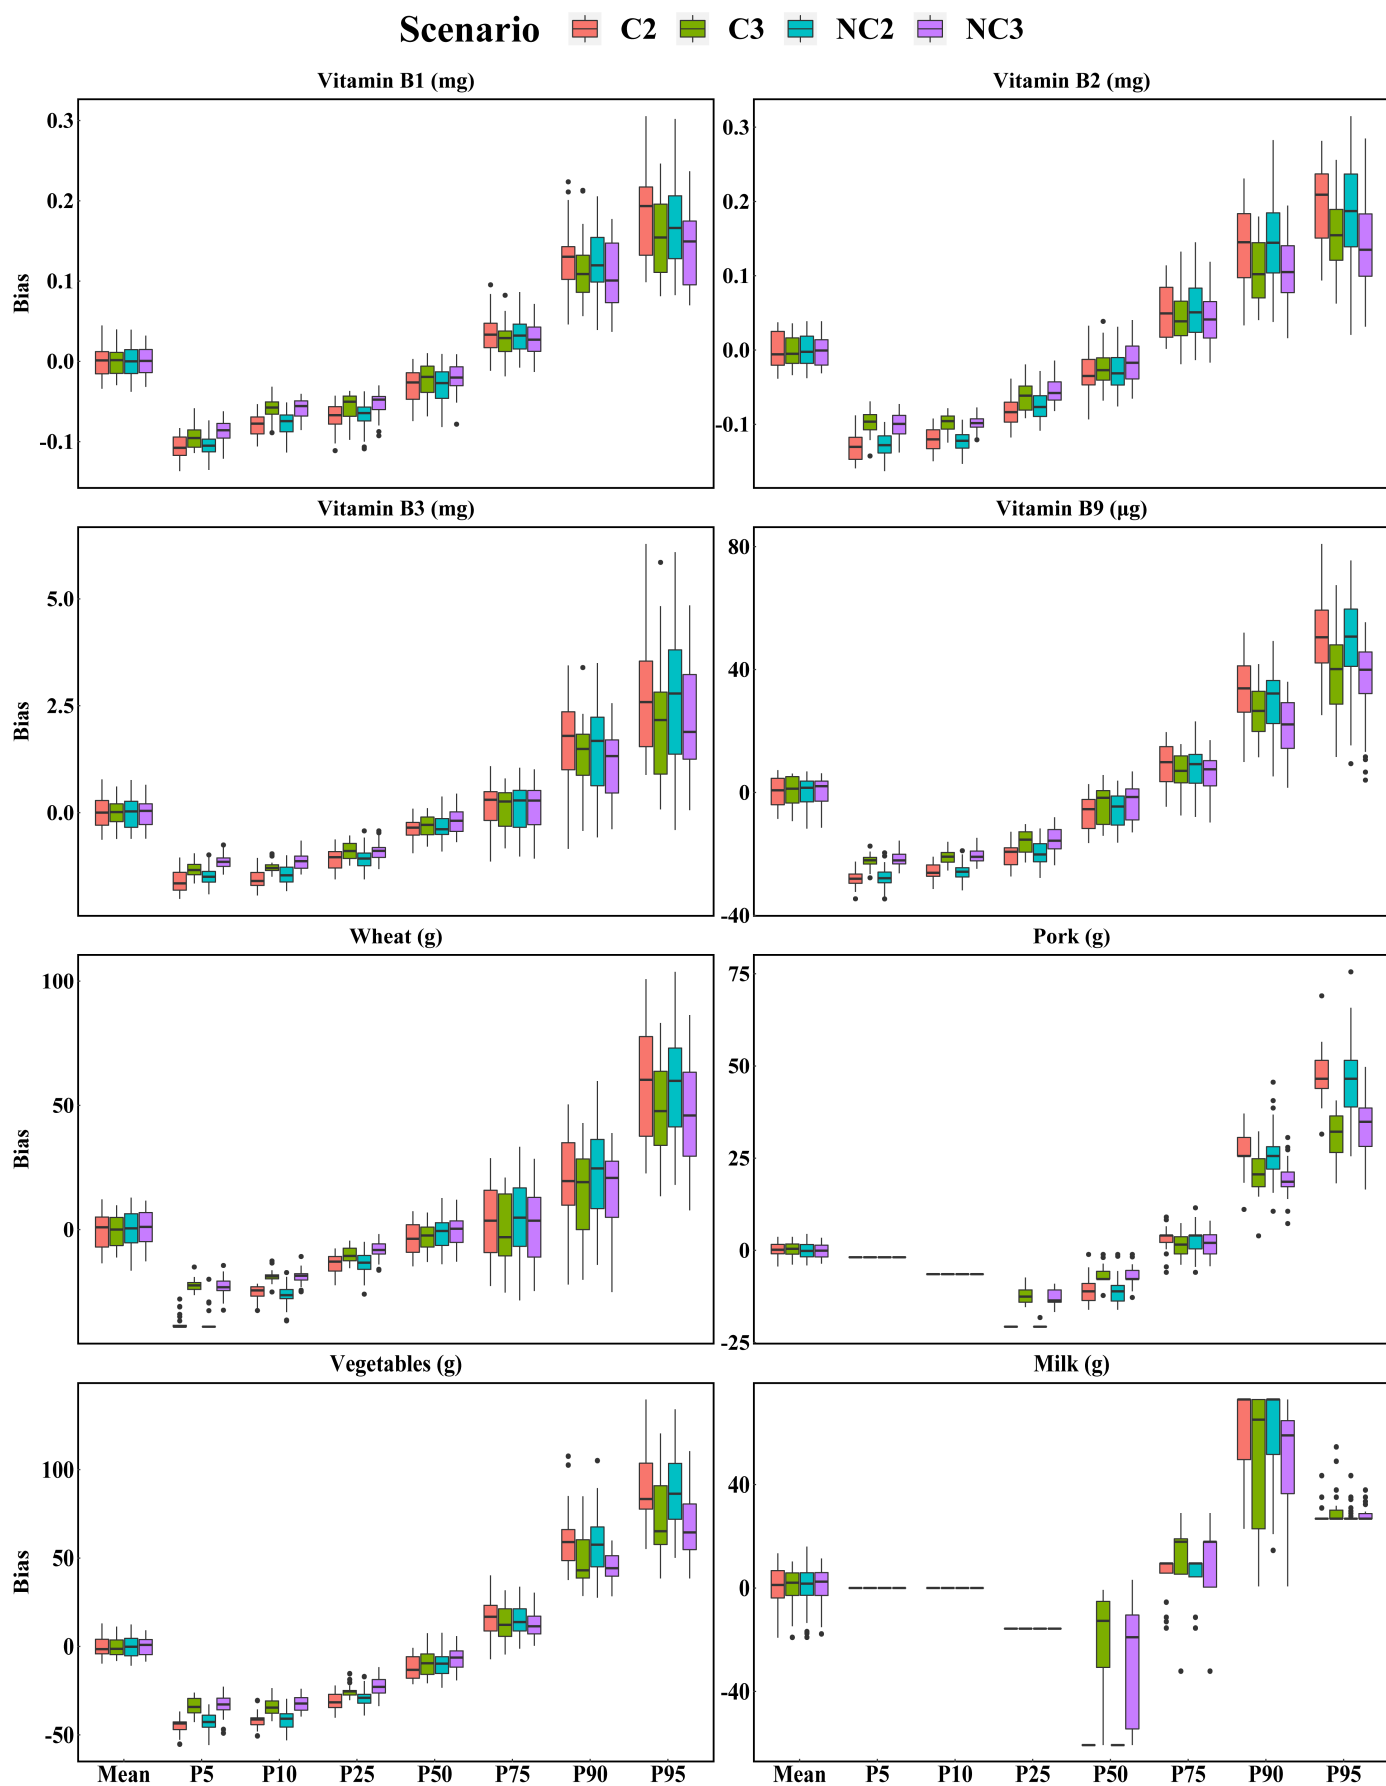

Figure S1. *Cont.*

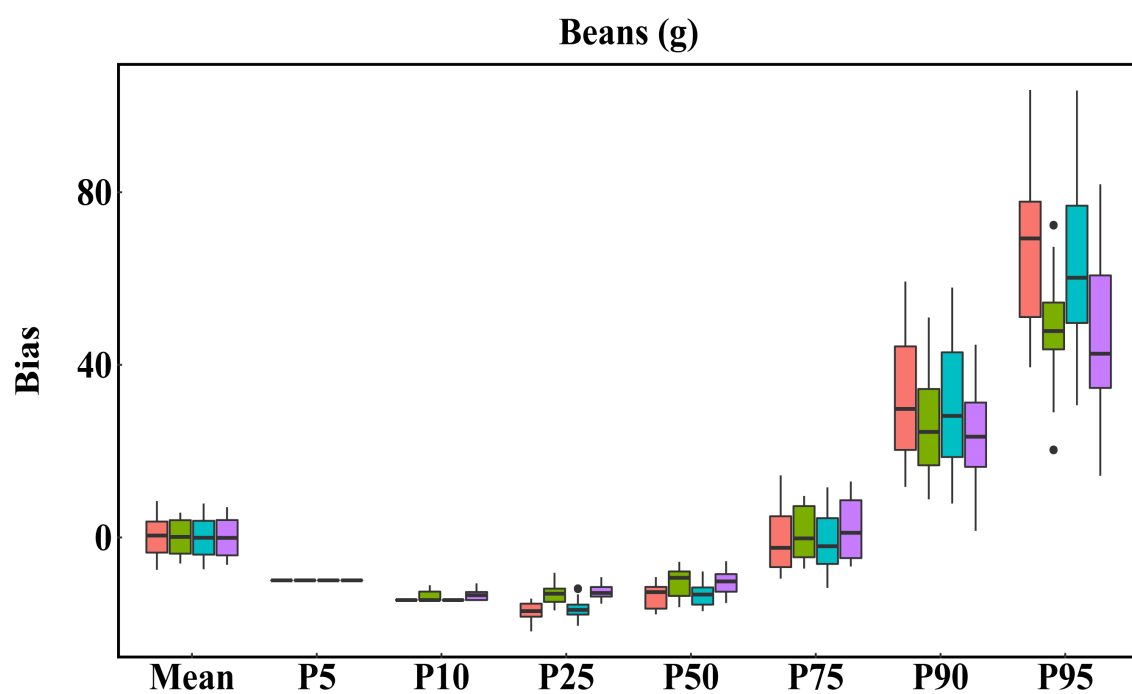

**Figure S1. Cont.**
